# Supplementary material for: Specific Inhibition of Tumor Cells by Oncogenic EGFR Specific Silencing by RNA interference
Source: PLOS journal article supplement (doi:10.1371/journal.pone.0073214), 2013-08-08
Supplement: S15 (10.1371/journal.pone.0073214.s015) [file journal.pone.0073214.s015]

**Table S1.** The sequences of synthetic siRNAs against *EGFR* deletions.

| siRNA name                                       | ss or as <sup>a)</sup> | 5' - sequence - 3' <sup>b)</sup> |
|--------------------------------------------------|------------------------|----------------------------------|
| siRNAs targeting <i>EGFR</i> L747_E749del, A750P |                        |                                  |
| si747/49_3D3                                     | ss                     | CGUCGCUAUCAAGGAA-CCA             |
|                                                  | as                     | UGG-UUCCUUGAUAGCGACG             |
| si747/49_3D4                                     | ss                     | GUCGCUAUCAAGGAA-CCAA             |
|                                                  | as                     | UUGG-UUCCUUGAUAGCGAC             |
| si747/49_3D5                                     | ss                     | UCGCUAUCAAGGAA-CCAAC             |
|                                                  | as                     | GUUGG-UUCCUUGAUAGCGA             |
| si747/49_3D6                                     | ss                     | CGCUAUCAAGGAA-CCAACA             |
|                                                  | as                     | UGUUGG-UUCCUUGAUAGCG             |
| si747/49_3D7                                     | ss                     | GCUAUCAAGGAA-CCAACAU             |
|                                                  | as                     | AUGUUGG-UUCCUUGAUAGC             |
| si747/49_3D8                                     | ss                     | CUAUCAAGGAA-CCAACAUC             |
|                                                  | as                     | GAUGUUGG-UUCCUUGAUAG             |
| si747/49_3D9                                     | ss                     | UAUCAAGGAA-CCAACAUCU             |
|                                                  | as                     | AGAUGUUGG-UUCCUUGAUA             |
| si747/49_3D10                                    | ss                     | AUCAAGGAA-CCAACAUCUC             |
|                                                  | as                     | GAGAUGUUGG-UUCCUUGAU             |
| si747/49_3D11                                    | ss                     | UCAAGGAA-CCAACAUCUCC             |
|                                                  | as                     | GGAGAUGUUGG-UUCCUUGA             |
| siRNAs targeting <i>EGFR</i> E746_A750del        |                        |                                  |
| si746/50_3D4                                     | ss                     | UCCCGUCGCUAUCAA-AACA             |
|                                                  | as                     | UGUU-UUGAUAGCGACGGGA             |
| si746/50_3D6                                     | ss                     | CCGUCGCUAUCAA-AACAUC             |
|                                                  | as                     | GAUGUU-UUGAUAGCGACGG             |
| si746/50_3D8                                     | ss                     | GUCGCUAUCAA-AACAUCUC             |
|                                                  | as                     | GAGAUGUU-UUGAUAGCGAC             |
| si746/50_3D10                                    | ss                     | CGCUAUCAA-AACAUCUCCG             |
|                                                  | as                     | CGGAGAUGUU-UUGAUAGCG             |
| si746/50_3D12                                    | ss                     | CUAUCAA-AACAUCUCCGAA             |
|                                                  | as                     | UUCGGAGAUGUU-UUGAUAG             |
| si746/50_3D14                                    | ss                     | AUCAA-AACAUCUCCGAAAG             |
|                                                  | as                     | CUUUCGGAGAUGUU-UUGAU             |
| si746/50_3D16                                    | ss                     | CAA-AACAUCUCCGAAAGCC             |
|                                                  | as                     | GGCUUUCGGAGAUGUU-UUG             |

<sup>a)</sup> ss: sense-strand, as: antisense-strand.

<sup>b)</sup> Deletion mutation sites are indicated by hyphen.
