# Supplementary material for: Specific Inhibition of Tumor Cells by Oncogenic EGFR Specific Silencing by RNA interference
Source: PLOS journal article supplement (doi:10.1371/journal.pone.0073214), 2013-08-08
Supplement: S17 (10.1371/journal.pone.0073214.s017) [file journal.pone.0073214.s017]

**Table S3.** Hematological parameters in xenograft mouse models treated with siRNAs at Day 28.

|                            | Non-treatment | Delivery vehicle | siControl    | si747/49_3D8 |
|----------------------------|---------------|------------------|--------------|--------------|
| RBC (x10 <sup>4</sup> /uL) | 964.0 ± 92.4  | 884.0 ± 75.3     | 944.0 ± 81.4 | 984.0 ± 95.8 |
| WBC (x10 <sup>2</sup> /uL) | 22.8 ± 2.9    | 24.0 ± 2.2       | 22.2 ± 2.3   | 22.2 ± 3.7   |
| Ht (%)                     | 52.0 ± 1.4    | 51.8 ± 1.7       | 51.0 ± 1.4   | 52.0 ± 1.3   |

The same mice investigated in Fig. S5 were examined at Day 28.

Data are averages of 5 individual specimens in each group (± SD).

No significant difference was observed by one-way ANOVA.
