# Supplementary material for: Specific Inhibition of Tumor Cells by Oncogenic EGFR Specific Silencing by RNA interference
Source: PLOS journal article supplement (doi:10.1371/journal.pone.0073214), 2013-08-08
Supplement: S19 (10.1371/journal.pone.0073214.s019) [file journal.pone.0073214.s019]

**Table S5.** Body weight of ICR mice treated with siRNAs.

| Injected agent   | Days after the first siRNA injection |            |            |            |
|------------------|--------------------------------------|------------|------------|------------|
|                  | Day 0                                | Day 2      | Day 4      | Day 6      |
| Delivery vehicle | 32.4 ± 1.5                           | 33.5 ± 2.8 | 34.5 ± 2.8 | 35.0 ± 3.2 |
| siControl        | 32.6 ± 1.9                           | 31.5 ± 2.7 | 34.3 ± 2.2 | 33.9 ± 2.1 |
| si747/49_3D8     | 33.1 ± 2.6                           | 34.3 ± 3.0 | 33.9 ± 3.5 | 34.0 ± 2.0 |
| siEgfr           | 32.1 ± 2.1                           | 32.9 ± 3.0 | 33.0 ± 3.3 | 33.9 ± 2.6 |

The agents indicated were intravenously injected three times every second day to ICR mice.

Data are averages of 5 individual mice per group ( $\pm$  SD).

No significant difference was observed by two-way ANOVA.
