# Supplementary material for: Specific Inhibition of Tumor Cells by Oncogenic EGFR Specific Silencing by RNA interference
Source: PLOS journal article supplement (doi:10.1371/journal.pone.0073214), 2013-08-08
Supplement: S20 (10.1371/journal.pone.0073214.s020) [file journal.pone.0073214.s020]

**Table S6.** Hematological parameters in ICR mice treated with siRNAs.

|                                   | Delivery vehicle | siControl        | si747/49_3D8     | siEgfr            |
|-----------------------------------|------------------|------------------|------------------|-------------------|
| RBC ( $\times 10^4/\mu\text{L}$ ) | 901.0 $\pm$ 77.4 | 873.8 $\pm$ 67.5 | 870.8 $\pm$ 72.2 | 958.4 $\pm$ 102.6 |
| WBC ( $\times 10^2/\mu\text{L}$ ) | 24.9 $\pm$ 3.9   | 24.0 $\pm$ 3.5   | 25.1 $\pm$ 5.4   | 22.5 $\pm$ 3.2    |
| Ht (%)                            | 51.3 $\pm$ 3.1   | 52.4 $\pm$ 1.9   | 49.1 $\pm$ 3.7   | 47.9 $\pm$ 4.7    |

The same mice investigated in Fig. 4 and Table S5 were examined at Day 6.

Data are averages of 5 individual specimens in each group ( $\pm$  SD).

No significant difference was observed by one-way ANOVA.
